# Supplementary material for: Global Excess Mortality during COVID-19 Pandemic: A Systematic Review and Meta-Analysis
Source: MDPI journal article supplement (doi:10.3390/vaccines10101702), 2022-10-12
Supplement: s1 [file s1]

## **Supplemental materialse**

### **Methods Search Strategies Text S1**

#### **PubMed Advance Search**

- #1 Search: (COVID-19[MeSH Terms]) OR (SARS-CoV-2[MeSH Terms])
- #2 (((Severe Acute Respiratory Syndrome Coronavirus 2) OR (coronavirus disease 2019)) OR (sars-cov\*)) OR (SARS Coronavirus\*) OR (covid\*)
- #3 ((COVID-19[MeSH Terms]) OR (SARS-CoV-2[MeSH Terms])) OR (((Severe Acute Respiratory Syndrome Coronavirus 2) OR (coronavirus disease 2019)) OR (sars-cov\*)) OR (SARS Coronavirus\*) OR (covid\*))
- #4 Search: ((additional death\*) OR (excess death\*)) OR (excess mortalit\*)
- #5 (((COVID-19[MeSH Terms]) OR (SARS-CoV-2[MeSH Terms])) OR (((Severe Acute Respiratory Syndrome Coronavirus 2) OR (coronavirus disease 2019)) OR (sars-cov\*)) OR (SARS Coronavirus\*) OR (covid\*))) AND (((additional death\*) OR (excess death\*)) OR (excess mortalit\*))
- #6 ("2020/01/01"[Date - Publication] : "2022/05/21"[Date - Publication])
- #7 (((COVID-19[MeSH Terms]) OR (SARS-CoV-2[MeSH Terms])) OR (((Severe Acute Respiratory Syndrome Coronavirus 2) OR (coronavirus disease 2019)) OR (sars-cov\*)) OR (SARS Coronavirus\*) OR (covid\*))) AND (((additional death\*) OR (excess death\*)) OR (excess mortalit\*)) AND ("2020/01/01"[Date - Publication] : "2022/05/21"[Date - Publication])

#### **Embase Advance Search**

- #1 'severe acute respiratory syndrome coronavirus 2'/exp
- #2 'coronavirus disease 2019'/exp
- #3 'sars cov\*' OR 'sars coronavirus\*' OR covid\*
- #4 #1 OR #2 OR #3
- #5 'excess mortality'/exp
- #6 'additional death\*' OR 'excess death\*' OR 'excess mortalit\*'
- #7 #5 OR #6
- #8 #4 AND #7

**#9** #4 AND #7 AND [embase]/lim AND [01-01-2020]/sd NOT [22-05-2022]/sd

### **Web of Science Advance Search**

TS= (SARS-CoV\* OR covid\* OR Severe acute respiratory syndrome coronavirus 2  
OR coronavirus disease 2019 OR SARS Coronavirus\*) AND TS= (additional  
death\* OR excess death\* OR excess mortalit\*)

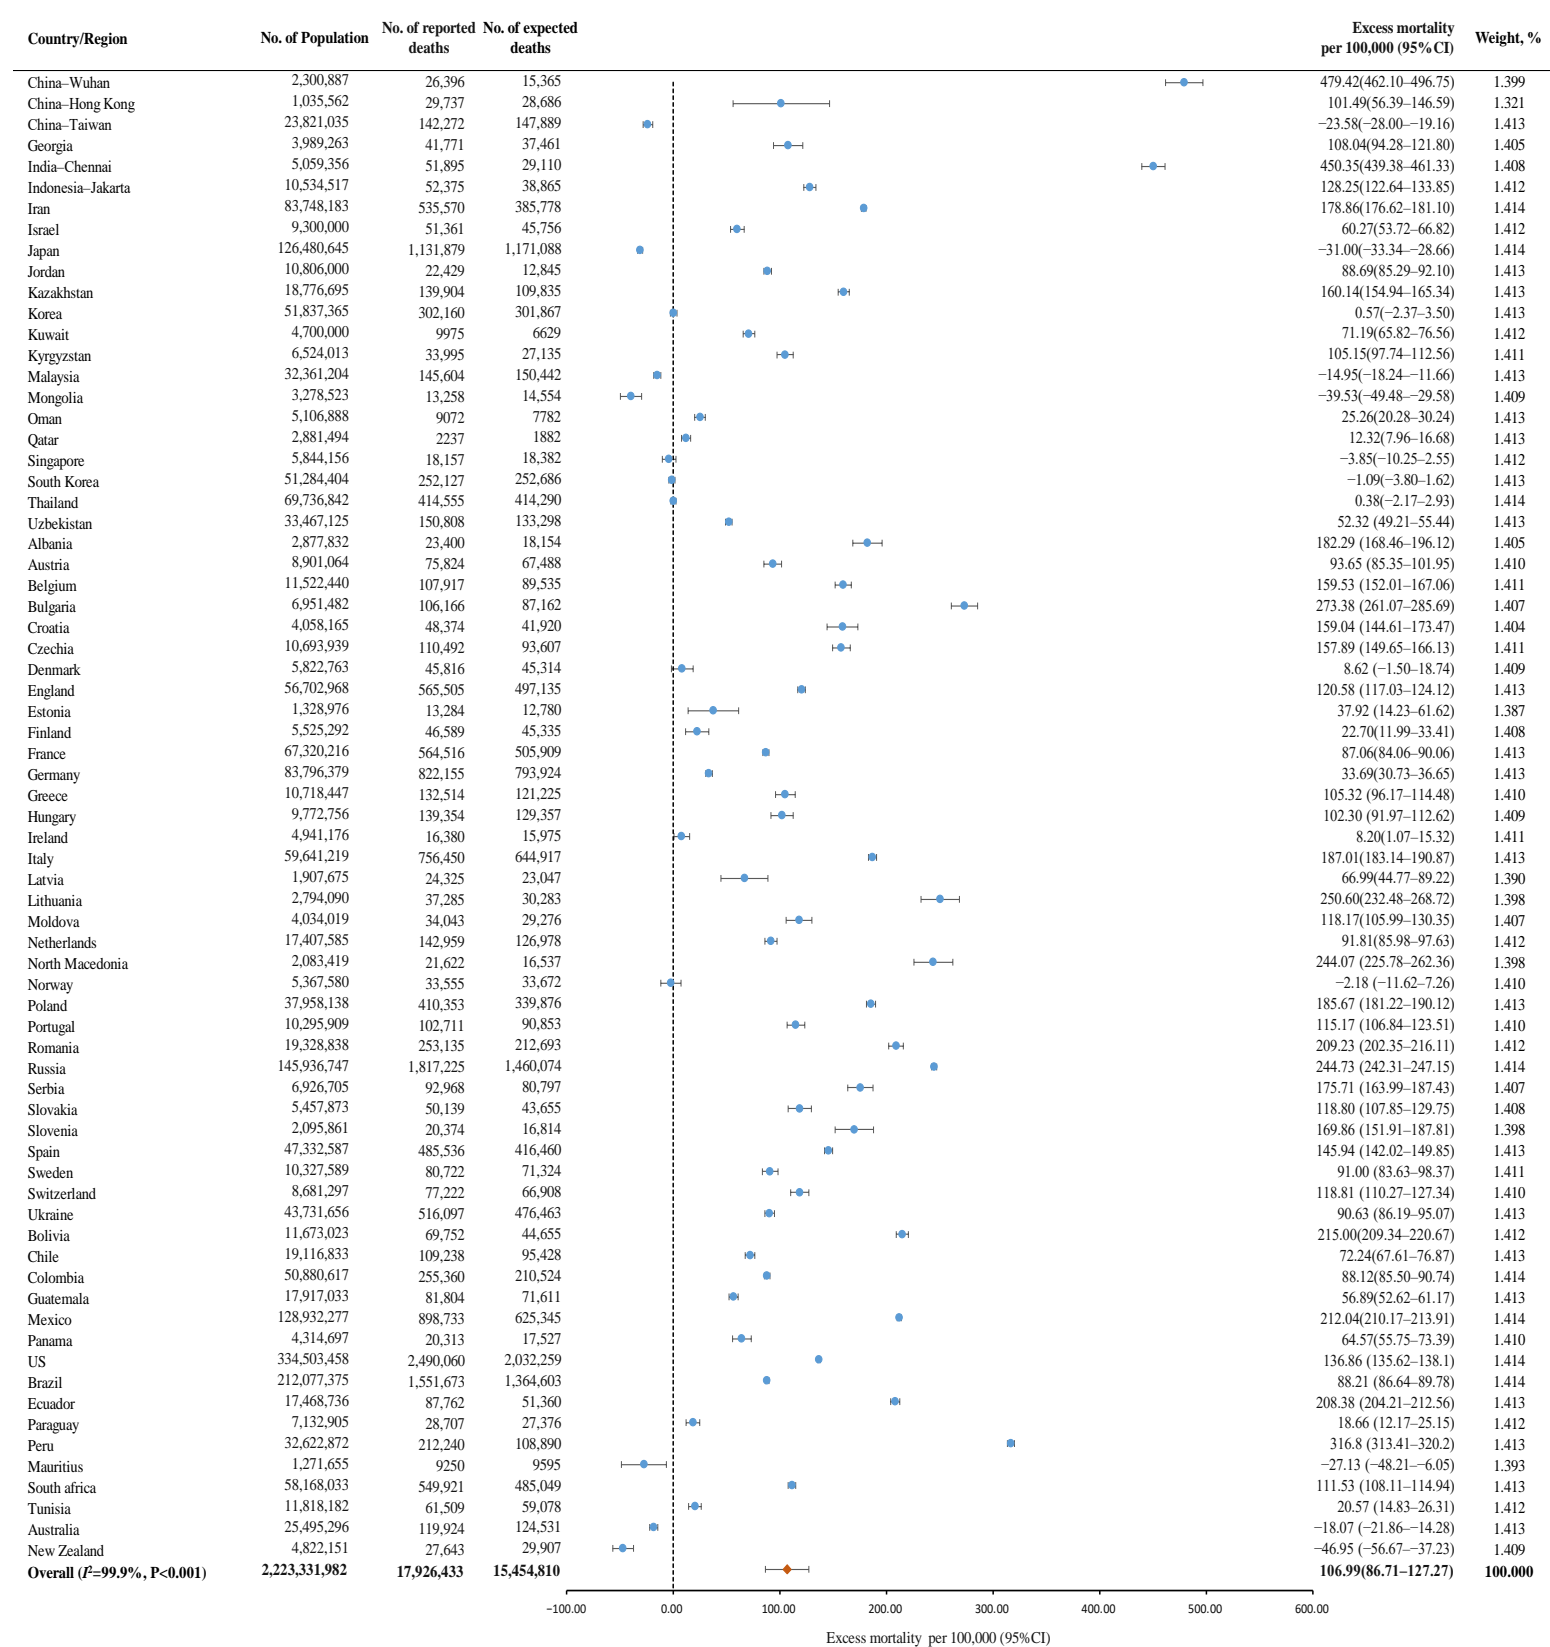

**Figure S1** Sensitive analysis of excess mortality among 71 countries/regions  
Orange dot: the pooled excess mortality; Blue dot: excess mortality in different countries; CI: confidence interval.

**Table S1.** Risk of bias of all included cross-sectional studies using the Agency for Healthcare Research and Quality scale (AHRQ-Tool) (n=18)

| Author                | 1) Define the source of information | 2) List definition for expected and reported deaths | 3) Indicate time period used for identifying death | 4) Indicate whether or not subjects were consecutive if not population-based | 5) Indicate if evaluators of subjective components of study were masked to other aspects of the status of the participants | 6) Describe any assessments undertaken for quality assurance purposes (at least 3 years data) | 7) Explain any deaths exclusions from analysis | 8) Describe how confounding was assessed (gender, age, etc.) | 9) If applicable, explain how missing data were handled in the analysis | 10) Summarize completeness of death data collection | 11) Clarify reported time and recorded time of deaths and the time lag of deaths for which incomplete data or follow-up was obtained | Total scores | Article quality |
|-----------------------|-------------------------------------|-----------------------------------------------------|----------------------------------------------------|------------------------------------------------------------------------------|----------------------------------------------------------------------------------------------------------------------------|-----------------------------------------------------------------------------------------------|------------------------------------------------|--------------------------------------------------------------|-------------------------------------------------------------------------|-----------------------------------------------------|--------------------------------------------------------------------------------------------------------------------------------------|--------------|-----------------|
| Santos et al          | yes                                 | yes                                                 | yes                                                | yes                                                                          | yes                                                                                                                        | yes                                                                                           | yes                                            | yes                                                          | unclear                                                                 | yes                                                 | no                                                                                                                                   | 9            | High            |
| Bogos et al           | yes                                 | yes                                                 | yes                                                | yes                                                                          | yes                                                                                                                        | yes                                                                                           | yes                                            | yes                                                          | yes                                                                     | yes                                                 | no                                                                                                                                   | 10           | High            |
| Alahmad et al         | yes                                 | yes                                                 | yes                                                | yes                                                                          | yes                                                                                                                        | yes                                                                                           | yes                                            | no                                                           | yes                                                                     | yes                                                 | no                                                                                                                                   | 9            | High            |
| Bradshaw et al        | yes                                 | yes                                                 | yes                                                | yes                                                                          | yes                                                                                                                        | no                                                                                            | yes                                            | yes                                                          | yes                                                                     | yes                                                 | yes                                                                                                                                  | 10           | High            |
| Achilleos et al       | yes                                 | yes                                                 | yes                                                | yes                                                                          | yes                                                                                                                        | yes                                                                                           | yes                                            | no                                                           | yes                                                                     | yes                                                 | yes                                                                                                                                  | 10           | High            |
| Aytemur et al         | yes                                 | yes                                                 | yes                                                | yes                                                                          | yes                                                                                                                        | no                                                                                            | yes                                            | no                                                           | no                                                                      | yes                                                 | no                                                                                                                                   | 7            | Moderate        |
| Shin et al            | yes                                 | yes                                                 | yes                                                | yes                                                                          | yes                                                                                                                        | yes                                                                                           | yes                                            | yes                                                          | unclear                                                                 | yes                                                 | no                                                                                                                                   | 9            | High            |
| Ramírez-Soto et al    | yes                                 | yes                                                 | yes                                                | yes                                                                          | yes                                                                                                                        | yes                                                                                           | yes                                            | yes                                                          | yes                                                                     | yes                                                 | no                                                                                                                                   | 10           | High            |
| Safavi-Naini et al    | yes                                 | yes                                                 | yes                                                | yes                                                                          | yes                                                                                                                        | yes                                                                                           | yes                                            | yes                                                          | unclear                                                                 | yes                                                 | no                                                                                                                                   | 9            | High            |
| Rangachev et al       | yes                                 | yes                                                 | yes                                                | yes                                                                          | yes                                                                                                                        | yes                                                                                           | yes                                            | yes                                                          | yes                                                                     | yes                                                 | no                                                                                                                                   | 10           | High            |
| Wijaya et al          | yes                                 | yes                                                 | yes                                                | yes                                                                          | yes                                                                                                                        | yes                                                                                           | yes                                            | yes                                                          | no                                                                      | yes                                                 | no                                                                                                                                   | 9            | High            |
| Peretz et al          | yes                                 | yes                                                 | yes                                                | yes                                                                          | yes                                                                                                                        | yes                                                                                           | yes                                            | yes                                                          | unclear                                                                 | yes                                                 | yes                                                                                                                                  | 10           | Hhigh           |
| Sanmarchi et al       | yes                                 | yes                                                 | yes                                                | yes                                                                          | yes                                                                                                                        | yes                                                                                           | yes                                            | no                                                           | yes                                                                     | yes                                                 | no                                                                                                                                   | 9            | Hhigh           |
| Konstantinoudis et al | yes                                 | yes                                                 | yes                                                | yes                                                                          | yes                                                                                                                        | yes                                                                                           | yes                                            | yes                                                          | unclear                                                                 | yes                                                 | unclear                                                                                                                              | 9            | High            |
| Lewnard et al         | yes                                 | yes                                                 | yes                                                | yes                                                                          | yes                                                                                                                        | yes                                                                                           | yes                                            | yes                                                          | unclear                                                                 | yes                                                 | no                                                                                                                                   | 9            | High            |
| Liu et al             | yes                                 | yes                                                 | yes                                                | yes                                                                          | yes                                                                                                                        | yes                                                                                           | yes                                            | yes                                                          | unclear                                                                 | yes                                                 | yes                                                                                                                                  | 10           | High            |
| Khader et al          | yes                                 | yes                                                 | yes                                                | yes                                                                          | yes                                                                                                                        | yes                                                                                           | yes                                            | yes                                                          | unclear                                                                 | yes                                                 | no                                                                                                                                   | 9            | High            |

|                |     |     |     |     |     |     |     |     |         |     |    |   |      |
|----------------|-----|-----|-----|-----|-----|-----|-----|-----|---------|-----|----|---|------|
| Cue´llar et al | yes | unclear | yes | no | 9 | High |
|----------------|-----|-----|-----|-----|-----|-----|-----|-----|---------|-----|----|---|------|

Note: low quality = 0–3; moderate quality = 4–7; high quality = 8–11

**Table S2.** Risk of bias of all included cohort studies using the Newcastle-Ottawa quality assessment scale (n=2)

| Author         | Selection                                |                                     |                           |                                                                          | Comparability                                                   | Outcome               |                                                 |                                                    | Total | Risk level |
|----------------|------------------------------------------|-------------------------------------|---------------------------|--------------------------------------------------------------------------|-----------------------------------------------------------------|-----------------------|-------------------------------------------------|----------------------------------------------------|-------|------------|
|                | Representativeness of the Exposed Cohort | Selection of the Non-Exposed Cohort | Ascertainment of Exposure | Demonstration That Outcome of Interest Was Not Present at Start of Study | Comparability of Cohorts on the Basis of the Design or Analysis | Assessment of Outcome | Was Follow-Up Long Enough for Outcomes to Occur | Adequacy of Follow Up of Cohorts (28days at least) |       |            |
| Wai et al      | 1                                        | 1                                   | 1                         | 0                                                                        | 2                                                               | 1                     | 1                                               | 1                                                  | 8     | Low        |
| Jacobson et al | 1                                        | 1                                   | 1                         | 1                                                                        | 2                                                               | 1                     | 1                                               | 0                                                  | 8     | Low        |

Note: low (≥7 scores), moderate (5–6 scores), and high risk of bias (≤4 scores)
